# Supplementary material for: Multiple Ethnic Origins of Mitochondrial DNA Lineages for the Population of Mauritius
Source: PLoS One. 2014 Mar 27;9(3):e93294. doi: 10.1371/journal.pone.0093294 (PMC3968120; doi:10.1371/journal.pone.0093294)
Supplement: Table S1 — Populations used for comparison in this study. (XLSX) [file pone.0093294.s006.xlsx]

## Sheet: Table S1
Table S1 - Populations used for comparison in this study
MAURITIUS (n = 97)
	This study	97
RÉUNION ISLAND (n = 303)
	Berriel-Lee et al. 2008	41
	Dubut et al. 2009	262
MADAGASCAR (n = 170)
	Hurles et al. 2005	37
	Tofanelli et al. 2009	133
SOUTH ASIA (n = 6504)
West India & Pakistan (1035)
India (Gujarat)	Eaaswarkhanth et al. 2010	50
India (Gujarat)	Kivisild et al. 1999	4
India (Gujarat)	Metspalu et al. 2004	53
India (Gujarat)	Quintana-Murci et al. 1999	34
India (Maharashtra)	Baig et al. 2004	74
India (Maharashtra)	Basu et al. 2003	30
India (Maharashtra)	Gaikward et al. 2005	77
India (Maharashtra)	Kivisild et al. 1999	4
India (Maharashtra)	Metspalu et al. 2004	113
India (Maharashtra)	Thangaraj et al. 2010	185
India (Rajastan)	Kivisild et al. 1999	1
India (Rajastan)	Metspalu et al. 2004	35
Pakistan	Cordaux et al. 2003	36
Pakistan	Kivisild et al. 1999	9
Pakistan	Quintana-Murci et al. 2004	100
Pakistan	Rakha et al. 2011	230
Southwest India (649)
India (Karnataka)	Cordaux et al. 2003	112
India (Karnataka)	Mountain et al. 1995	89
India (Karnataka)	Rajkumar et al. 2003a	87
India (Karnataka)	Rajkumar et al. 2003b	131
India (Kerala)	Cordaux et al. 2003	123
India (Kerala)	Metspalu et al. 2004	100
India (Kerala)	Mountain et al. 1995	7
North India (1674)
India (Bihar)	Basu et al. 2003	17
India (Bihar)	Kivisild et al. 1999	2
India (Bihar)	Sharma et al. 2005	26
India (Chota Nagpur Plateau)	Banerjee et al. 2005	80
India (Himachal Pradesh)	Metspalu et al. 2004	37
India (Kashmir)	Kivisild et al. 1999	19
India (Madhya Pradesh)	Basu et al. 2003	70
India (Madhya Pradesh)	Roychoudhury et al. 2001	12
India (Madhya Pradesh)	Sharma et al. 2012	209
India (New Delhi)	Fornarino et al. 2009	24
India (Punjab)	Basu et al. 2003	56
India (Punjab)	Cordaux et al. 2003	40
India (Punjab)	Kaur et al. 2002	56
India (Punjab)	Kivisild et al. 1999	63
India (Punjab)	Metspalu et al. 2004	112
India (Punjab)	Sharma et al. 2005	35
India (Terai)	Fornarino et al. 2009	48
India (Uttar Pradesh)	Basu et al. 2003	40
India (Uttar Pradesh)	Eaaswarkhanth et al. 2010	251
India (Uttar Pradesh)	Kivisild et al. 1999	103
India (Uttar Pradesh)	Metspalu et al. 2004	56
India (Uttar Pradesh)	Sharma et al. 2005	33
India (West Bengal)	Basu et al. 2003	89
India (West Bengal)	Kivisild et al. 1999	1
India (West Bengal)	Metspalu et al. 2004	161
India (West Bengal)	Roychoudhury et al. 2001	34
Southeast India (2393)
India (Andhra Pradesh)	Bamshad et al. 1998	243
India (Andhra Pradesh)	Cordaux et al. 2003	121
India (Andhra Pradesh)	Eaaswarkhanth et al. 2010	48
India (Andhra Pradesh)	Fornarino et al. 2009	29
India (Andhra Pradesh)	Kivisild et al. 1999	88
India (Andhra Pradesh)	Kivisild et al. 2003	175
India (Andhra Pradesh)	Mittal et al. 2008	588
India (Andhra Pradesh)	Sharma et al. 2005	17
India (Andhra Pradesh)	Thangaraj et al. 1999	8
India (Andhra Pradesh)	Thanseem et al. 2006	347
India (Andhra Pradesh)	Wooding et al. 2004	26
India (Orissa)	Basu et al. 2003	20
India (Orissa)	Kivisild et al. 2003	2
India (Orissa)	Sahoo et al. 2006	131
India (Tamil Nadu)	Basu et al. 2003	122
India (Tamil Nadu)	Cordaux et al. 2003	99
India (Tamil Nadu)	Eaaswarkhanth et al. 2010	123
India (Tamil Nadu)	Kivisild et al. 1999	2
India (Tamil Nadu)	Roychoudhury et al. 2001	49
India (Tamil Nadu)	Watkins et al. 2008	155
East India & Bangladesh (314)
Bangladesh	Cordaux et al. 2003	29
Bangladesh	Kivisild et al. 1999	1
India (Arunachal Pradesh)	Cordaux et al. 2003	26
India (Assam)	Cordaux et al. 2003	58
India (Manipur)	Basu et al. 2003	9
India (Mizoram)	Basu et al. 2003	14
India (Nagaland)	Cordaux et al. 2003	43
India (Tripura)	Basu et al. 2003	49
India (Tripura)	Cordaux et al. 2003	65
India (Tripura)	Roychoudhury et al. 2001	20
EAST ASIA (n = 9074)
	Comas et al. 1998	204
	Hill et al. 2007	78
	Horai et al. 1996	167
	Jin et al. 2009	363
	Kayser et al. 2006	121
	Kivisild et al. 2002	69
	Kong et al. 2003	232
	Lee et al. 1997	306
	Lee et al. 2006	592
	Li et al. 2007	828
	Liu et al. 2011	102
	Loo et al. 2011	71
	Lum & Cann 2000	57
	Maruyama et al. 2003	211
	Matsukusa et al. 2010	55
	Melton et al. 1998	28
	Nishimaki et al. 1999	270
	Nohira et al. 2010	100
	Oota et al. 2002	256
	Pfeiffer et al. 1998	60
	Pierson et al. 2006	2
	Qian et al. 2001	99
	Qin et al. 2010	562
	Seo et al. 1998	100
	Tabbada et al. 2010	74
	Tajima et al. 2004	231
	Tanaka et al. 2004	672
	Tsai et al. 2001	155
	Wen et al. 2004a	711
	Wen et al. 2004b	47
	Wen et al. 2005	537
	Yao & Zhang 2002	71
	Yao et al. 2000	75
	Yao et al. 2002a	380
	Yao et al. 2002a; Yao & Zhang 2002	41
	Yao et al. 2002b	262
	Yao et al. 2004	205
	Zhao et al. 2009	680
SOUTH EAST ASIA (n= 4293)
	Bodner et al. 2011	214
	Fucharoen et al. 2001	215
	Hill et al. 2006	447
	Hill et al. 2007	768
	Irwin et al. 2008	187
	Jin et al. 2009	82
	Kayser et al. 2006	251
	Lertrit et al. 2008	104
	Li et al. 2007	68
	Lum & Cann 2000	93
	Macaulay et al. 2005	99
	Oota et al. 2002	339
	Peng et al. 2010	307
	Pfeiffer et al. 1998	263
	Pierson et al. 2006	2
	Redd and Stoneking 1999	31
	Tabbada et al. 2010	435
	Tajima et al. 2004	165
	Yao et al. 2002a	33
	Zimmermann et al. 2009	190
AUSTRONESIA (n = 4451)		4451
Australia	Hudjashov et al. 2007	37
Australia	Lum & Cann 2000	12
Australia	Huoponen et al. 2001	54
Australia	Redd and Stoneking 1999	50
Melanesia	Delfin et al. 2012	703
Melanesia	Hagelberg et al. 1998	41
Melanesia	Kayser et al. 2006	45
Melanesia	Murray-McIntosch et al. 1998	57
Melanesia	Pierson et al. 2006	6
Melanesia (PNG)	Hudjashov et al. 2007	52
Melanesia (PNG)	Kayser et al. 2006	226
Melanesia (PNG)	Kayser et al. 2008	144
Melanesia (PNG)	Lee et al. 2010	94
Melanesia (PNG)	Lum & Cann 2000	17
Melanesia (PNG)	Ohashi et al. 2006	118
Melanesia (PNG)	Pierson et al. 2006	4
Melanesia (PNG)	Ricaut et al. 2008	47
Melanesia (PNG)	Tommaseo-Ponzetta et al. 2007	202
Melanesia (PNG)	Vilar et al. 2008	219
Micronesia	Lum & Cann 2000	530
Micronesia	Pierson et al. 2006	2
Polynesia	Deguilloux et al. 2010	17
Polynesia	Kayser et al. 2006	307
Polynesia	Lie et al. 2006	19
Polynesia	Lum & Cann 2000	239
Polynesia	Murray-McIntosch et al. 1998	235
Polynesia	Ohashi et al. 2006	43
Polynesia	Pierson et al. 2006	4
Polynesia	Thorsby et al. 2009	21
Polynesia	Whyte et al. 2005	86
Taiwan aborigines	Tajima et al. 2003	180
Taiwan aborigines	Trejaut et al. 2005	640
SUBSAHARAN AFRICA (n= 9780)
	Boattini et al. 2013	452
	Brandstätter et al. 2004	100
	Brehm et al. 2002	292
	Budowle et al. 1999	109
	Cerny et al. 2004	104
	Cerny et al. 2006	186
	Cerny et al. 2011	902
	Chen et al. 2000	74
	Coelho et al. 2009	365
	Coia et al. 2005	340
	Destro-Bisol et al. 2004a	57
	Destro-Bisol et al. 2004b; Coia et al. 2005	101
	Ely et al. 2006	80
	Fendt et al. 2012	129
	González et al. 2006	124
	Graven 1995; Watson 1997	119
	Jackson et al. 2005	277
	Knight et al. 2003	100
	Krings et al. 1999	156
	Krings et al. 1999; Kivisild et al. 2004	344
	Mateu et al. 1997	95
	Pereira et al. 2001	109
	Pereira et al. 2010	90
	Pinto et al. 1996	11
	Plaza et al. 2004	44
	Poloni et al. 2009	171
	Quintana-Murci et al. 2008	1404
	Rando et al. 1998	292
	Rosa et al. 2004	372
	Salas et al. 2002	307
	Silva 2006	20
	Soares et al. 2012	327
	Trovoada et al. 2004a	35
	Trovoada et al. 2004b	68
	Veeramah et al. 2010	1192
	Vigilant 1991 Watson 1997	63
	Watson et al. 1997	234
	Unpublished	535
EUROPE (n= 2913)
	Rousselet et al. 1998	50
	Danan et al. 1999	42
	Dubut et al. 2004	210
	Falchi et al. 2006	53
	Helgason et al. 2001	1341
	Piercy et al. 1993	100
	Richard et al. 2007	868
	Richards et al. 1996	161
	Varesi et al. 2000	47
	Unpublished results	41
REFERENCES:
Baig MM, Khan AA, Kulkarni KM: Mitochondrial DNA diversity in tribal and caste groups of Maharashtra (India) and its implication on their genetic origins. Ann Hum Genet 2004, 68(Pt 5):453-460.
Bamshad MJ, Watkins WS, Dixon ME, Jorde LB, Rao BB, Naidu JM, Prasad BV, Rasanayagam A, Hammer MF: Female gene flow stratifies Hindu castes. Nature 1998, 395(6703):651-652.
Banerjee J, Trivedi R, Kashyap VK: Mitochondrial DNA control region sequence polymorphism in four indigenous tribes of Chotanagpur plateau, India. Forensic Sci Int 2005; 149: 271-274.
Basu A, Mukherjee N, Roy S et al: Ethnic India: a genomic view, with special reference to peopling and structure. Genome Res 2003; 13: 2277-2290.
Berniell-Lee G, Plaza S, Bosch E, Calafell F, Jourdan E, Cesari M, Lefranc G, Comas D: Admixture and sexual bias in the population settlement of La Reunion Island (Indian Ocean). Am J Phys Anthropol 2008, 136(1):100-107.
Boattini A, Castri L, Sarno S, Useli A, Cioffi M, Sazzini M, Garagnani P, De Fanti S, Pettener D, Luiselli D: mtDNA variation in East Africa unravels the history of Afro-Asiatic groups. Am J Phys Anthropol 2013; 150(3):375-385.
Bodner M, Zimmermann B, Rock A, Kloss-Brandstatter A, Horst D, Horst B, Sengchanh S, Sanguansermsri T, Horst J, Kramer T et al: Southeast Asian diversity: first insights into the complex mtDNA structure of Laos. BMC Evol Biol 2011, 11:49.
Brandstatter A, Peterson CT, Irwin JA, Mpoke S, Koech DK, Parson W, Parsons TJ: Mitochondrial DNA control region sequences from Nairobi (Kenya): inferring phylogenetic parameters for the establishment of a forensic database. Int J Legal Med 2004, 118(5):294-306.
Brehm A, Pereira L, Bandelt HJ, Prata MJ, Amorim A: Mitochondrial portrait of the Cabo Verde archipelago: the Senegambian outpost of Atlantic slave trade. Ann Hum Genet 2002, 66(Pt 1):49-60.
Budowle B, Wilson MR, DiZinno JA, Stauffer C, Fasano MA, Holland MM, Monson KL: Mitochondrial DNA regions HVI and HVII population data. Forensic Sci Int 1999, 103(1):23-35.
Cerny V, Hajek M, Bromova M, Cmejla R, Diallo I, Brdicka R: MtDNA of Fulani nomads and their genetic relationships to neighboring sedentary populations. Hum Biol 2006, 78(1):9-27.
Cerny V, Hajek M, Cmejla R, Bruzek J, Brdicka R: mtDNA sequences of Chadic-speaking populations from northern Cameroon suggest their affinities with eastern Africa. Ann Hum Biol 2004, 31(5):554-569.
Cerny V, Pereira L, Musilova E, Kujanova M, Vasikova A, Blasi P, Garofalo L, Soares P, Diallo I, Brdicka R, et al: Genetic structure of pastoral and farmer populations in the African Sahel. Mol Biol Evol 2011; 28(9):2491-2500.
Chen YS, Olckers A, Schurr TG, Kogelnik AM, Huoponen K, Wallace DC: mtDNA variation in the South African Kung and Khwe-and their genetic relationships to other African populations. Am J Hum Genet 2000, 66(4):1362-1383.
Coelho M, Sequeira F, Luiselli D, Beleza S, Rocha J: On the edge of Bantu expansions: mtDNA, Y chromosome and lactase persistence genetic variation in southwestern Angola. BMC Evol Biol 2009; 9:80.
Coia V, Destro-Bisol G, Verginelli F, Battaggia C, Boschi I, Cruciani F, Spedini G, Comas D, Calafell F: Brief communication: mtDNA variation in North Cameroon: lack of Asian lineages and implications for back migration from Asia to sub-Saharan Africa. Am J Phys Anthropol 2005, 128(3):678-681.
Comas D, Calafell F, Mateu E, Perez-Lezaun A, Bosch E, Martinez-Arias R, Clarimon J, Facchini F, Fiori G, Luiselli D et al: Trading genes along the silk road: mtDNA sequences and the origin of central Asian populations. Am J Hum Genet 1998, 63(6):1824-1838.
Cordaux R, Saha N, Bentley GR, Aunger R, Sirajuddin SM, Stoneking M: Mitochondrial DNA analysis reveals diverse histories of tribal populations from India. Eur J Hum Genet 2003, 11(3):253-264.
Danan C, Sternberg D, Van Steirteghem A, Cazeneuve C, Duquesnoy P, Besmond C, Goossens M, Lissens W, Amselem S: Evaluation of parental mitochondrial inheritance in neonates born after intracytoplasmic sperm injection. Am J Hum Genet 1999, 65(2):463-473.
Deguilloux MF, Soler L, Pemonge MH, Scarre C, Joussaume R, Laporte L: News from the west: Ancient DNA from a French megalithic burial chamber. Am J Phys Anthropol.
Delfin F, Myles S, Choi Y et al: Bridging Near and Remote Oceania: mtDNA and NRY Variation in the Solomon Islands. Molecular Biology and Evolution 2012; 29: 545-564.
Destro-Bisol G, Coia V, Boschi I, Verginelli F, Caglia A, Pascali V, Spedini G, Calafell F: The analysis of variation of mtDNA hypervariable region 1 suggests that Eastern and Western Pygmies diverged before the Bantu expansion. Am Nat 2004a, 163(2):212-226.
Destro-Bisol G, Donati F, Coia V, Boschi I, Verginelli F, Caglia A, Tofanelli S, Spedini G, Capelli C: Variation of female and male lineages in sub-Saharan populations: the importance of sociocultural factors. Mol Biol Evol 2004b, 21(9):1673-1682.
Dubut V, Chollet L, Murail P, Cartault F, Beraud-Colomb E, Serre M, Mogentale-Profizi N: mtDNA polymorphisms in five French groups: importance of regional sampling. Eur J Hum Genet 2004, 12(4):293-300.
Dubut V, Murail P, Pech N, Thionville MD, Cartault F: Inter- and extra-Indian admixture and genetic diversity in reunion island revealed by analysis of mitochondrial DNA. Ann Hum Genet 2009; 73: 314-334.
Eaaswarkhanth M, Haque I, Ravesh Z, Romero IG, Meganathan PR, Dubey B, Khan FA, Chaubey G, Kivisild T, Tyler-Smith C et al: Traces of sub-Saharan and Middle Eastern lineages in Indian Muslim populations. Eur J Hum Genet, 18(3):354-363.
Ely B, Wilson JL, Jackson F, Jackson BA: African-American mitochondrial DNAs often match mtDNAs found in multiple African ethnic groups. BMC Biol 2006, 4:34.
Falchi A, Giovannoni L, Calo CM, Piras IS, Moral P, Paoli G, Vona G, Varesi L: Genetic history of some western Mediterranean human isolates through mtDNA HVR1 polymorphisms. Journal of Human Genetics 2006, 51(1):9-14.
Fendt L, Huber G, Rock AW, Zimmermann B, Bodner M, Delport R, Schmidt K, Parson W: Mitochondrial DNA control region data from indigenous Angolan Khoe-San lineages. Forensic Sci Int Genet 2012; 6(5):662-663.
Fornarino S, Pala M, Battaglia V, Maranta R, Achilli A, Modiano G, Torroni A, Semino O, Santachiara-Benerecetti SA: Mitochondrial and Y-chromosome diversity of the Tharus (Nepal): a reservoir of genetic variation. BMC Evol Biol 2009, 9:154.
Fucharoen G, Fucharoen S, Horai S: Mitochondrial DNA polymorphisms in Thailand. J Hum Genet 2001, 46(3):115-125.
Gaikwad S, Kashyap V: Molecular insight into the genesis of ranked caste populations of western India based upon polymorphisms across non-recombinant and recombinant regions in genome. Genome Biol 2005; 6: 10-50.
Gonzalez AM, Cabrera VM, Larruga JM, Tounkara A, Noumsi G, Thomas BN, Moulds JM: Mitochondrial DNA variation in Mauritania and Mali and their genetic relationship to other Western Africa populations. Ann Hum Genet 2006, 70(Pt 5):631-657.
Gourjon G, Boetsch G, Degioanni A: Gender and population history: sex bias revealed by studying genetic admixture of Ngazidja population (Comoro Archipelago). Am J Phys Anthropol 2011; 144: 653-660.
Graven L, Passarino G, Semino O, Boursot P, Santachiara-Benerecetti S, Langaney A, Excoffier L: Evolutionary correlation between control region sequence and restriction polymorphisms in the mitochondrial genome of a large Senegalese Mandenka sample. Mol Biol Evol 1995, 12(2):334-345.
Helgason A, Hickey E, Goodacre S, Bosnes V, Stefansson K, Ward R, Sykes B: mtDNA and the islands of the North Atlantic: estimating the proportions of Norse and Gaelic ancestry. Am J Hum Genet 2001, 68(3):723-737.
Hill C, Soares P, Mormina M, Macaulay V, Clarke D, Blumbach PB, Vizuete-Forster M, Forster P, Bulbeck D, Oppenheimer S et al: A mitochondrial stratigraphy for island southeast Asia. Am J Hum Genet 2007, 80(1):29-43.
Hill C, Soares P, Mormina M, Macaulay V, Meehan W, Blackburn J, Clarke D, Raja JM, Ismail P, Bulbeck D et al: Phylogeography and ethnogenesis of aboriginal Southeast Asians. Mol Biol Evol 2006, 23(12):2480-2491.
Horai S, Murayama K, Hayasaka K et al: mtDNA polymorphism in East Asian Populations, with special reference to the peopling of Japan. Am J Hum Genet 1996; 59: 579-590.
Hudjashov G, Kivisild T, Underhill PA et al: Revealing the prehistoric settlement of Australia by Y chromosome and mtDNA analysis. Proc Natl Acad Sci U S A 2007; 104: 8726-8730.
Huoponen K, Schurr TG, Chen YS, Wallace DC: Mitochondrial DNA variation in an Aboriginal Australian population: Evidence for genetic isolation and regional differentiation. Human Immunology 2001; 62: 954-969.
Hurles ME, Sykes BC, Jobling MA, Forster P: The dual origin of the Malagasy in Island Southeast Asia and East Africa: evidence from maternal and paternal lineages. Am J Hum Genet 2005, 76(5):894-901.
Irwin JA, Saunier JL, Strouss KM, Diegoli TM, Sturk KA, O'Callaghan JE, Paintner CD, Hohoff C, Brinkmann B, Parsons TJ: Mitochondrial control region sequences from a Vietnamese population sample. Int J Legal Med 2008, 122(3):257-259.
Jackson BA, Wilson JL, Kirbah S, Sidney SS, Rosenberger J, Bassie L, Alie JA, McLean DC, Garvey WT, Ely B: Mitochondrial DNA genetic diversity among four ethnic groups in Sierra Leone. Am J Phys Anthropol 2005, 128(1):156-163.
Jin H-J, Tyler-Smith C, Kim W: The Peopling of Korea Revealed by Analyses of Mitochondrial DNA and Y-Chromosomal Markers. PLoS ONE 2009, 4(1).
Kaur I, Roy S, Chakrabarti S et al: Genomic diversities and affinities among four endogamous groups of Punjab (India) based on autosomal and mitochondrial DNA polymorphisms. Hum Biol 2002; 74: 819-836.
Kayser M, Brauer S, Cordaux R, Casto A, Lao O, Zhivotovsky LA, Moyse-Faurie C, Rutledge RB, Schiefenhoevel W, Gil D et al: Melanesian and asian origins of Polynesians: mtDNA and Y chromosome gradients across the Pacific. Molecular Biology and Evolution 2006, 23(11):2234-2244.
Kayser M, Choi Y, van Oven M et al: The impact of the Austronesian expansion: Evidence from mtDNA and Y chromosome diversity in the Admiralty Islands of Melanesia. Molecular Biology and Evolution 2008; 25: 1362-1374.
Kivisild T, Bamshad MJ, Kaldma K, Metspalu M, Metspalu E, Reidla M, Laos S, Parik J, Watkins WS, Dixon ME et al: Deep common ancestry of indian and western-Eurasian mitochondrial DNA lineages. Curr Biol 1999, 9(22):1331-1334.
Kivisild T, Rootsi S, Metspalu M, Mastana S, Kaldma K, Parik J, Metspalu E, Adojaan M, Tolk HV, Stepanov V et al: The genetic heritage of the earliest settlers persists both in Indian tribal and caste populations. Am J Hum Genet 2003, 72(2):313-332.
Kivisild T, Tolk HV, Parik J et al: The emerging limbs and twigs of the East Asian mtDNA tree. Mol Biol Evol 2002; 19: 1737-1751.
Knight A, Underhill PA, Mortensen HM, Zhivotovsky LA, Lin AA, Henn BM, Louis D, Ruhlen M, Mountain JL: African Y chromosome and mtDNA divergence provides insight into the history of click languages. Curr Biol 2003, 13(6):464-473.
Kong QP, Yao YG, Liu M, Shen SP, Chen C, Zhu CL, Palanichamy MG, Zhang YP: Mitochondrial DNA sequence polymorphisms of five ethnic populations from northern China. Human Genetics 2003, 113(5):391-405.
Krings M, Salem AE, Bauer K, Geisert H, Malek AK, Chaix L, Simon C, Welsby D, Di Rienzo A, Utermann G et al: mtDNA analysis of Nile River Valley populations: A genetic corridor or a barrier to migration? Am J Hum Genet 1999, 64(4):1166-1176.
Lee EJ, Koki G, Merriwether DA: Characterization of Population Structure from the Mitochondrial DNA Vis-a-Vis Language and Geography in Papua New Guinea. American Journal of Physical Anthropology 2010; 142: 613-624.
Lee H, Yoo JE, Park M, Chung U, Shin KJ: Mitochondrial DNA control region sequences in Koreans: identification of useful variable sites and phylogenetic analysis for mtDNA data quality control. International Journal of Legal Medicine 2006, 120(1):5-14.
Lee SD, Shin CH, Kim KB, Lee YS, Lee JB: Sequence variation of mitochondrial DNA control region in Koreans. Forensic Science International 1997, 87(2):99-116.
Lertrit P, Poolsuwan S, Thosarat R, Sanpachudayan T, Boonyarit H, Chinpaisal C, Suktitipat B: Genetic History of Southeast Asian Populations as Revealed by Ancient and Modern Human Mitochondrial DNA Analysis. American Journal of Physical Anthropology 2008, 137(4):425-440.
Li H, Cai X, Winograd-Cort ER, Wen B, Cheng X, Qin Z, Liu W, Liu Y, Pan S, Qian J et al: Mitochondrial DNA diversity and population differentiation in southern East Asia. Am J Phys Anthropol 2007, 134(4):481-488.
Lie BA, Dupuy BM, Spurkland A, Fernandez-Vina MA, Hagelberg E, Thorsby E: Molecular genetic studies of natives on Easter Island: evidence of an early European and Amerindian contribution to the Polynesian gene pool. Tissue Antigens 2007, 69(1):10-18.
Liu C, Wang S-Y, Zhao M, Xu Z-Y, Hu Y-H, Chen F, Zhang R-Z, Gao G-F, Yu Y-S, Kong Q-P: Mitochondrial DNA polymorphisms in Gelao ethnic group residing in Southwest China. Forensic Science International-Genetics 2011, 5(1):E4-E10.
Loo J-H, Trejaut JA, Yen J-C, Chen Z-S, Lee C-L, Lin M: Genetic affinities between the Yami tribe people of Orchid Island and the Philippine Islanders of the Batanes archipelago. Bmc Genetics 2011, 12.
Lum JK, Cann RL: mtDNA lineage analyses: origins and migrations of Micronesians and Polynesians. Am J Phys Anthropol 2000, 113(2):151-168.
Macaulay V, Hill C, Achilli A, Rengo C, Clarke D, Meehan W, Blackburn J, Semino O, Scozzari R, Cruciani F et al: Single, rapid coastal settlement of Asia revealed by analysis of complete mitochondrial genomes. Science 2005, 308(5724):1034-1036.
Maruyama S, Minaguchi K, Saitou N: Sequence polymorphisms of the mitochondrial DNA control region and phylogenetic analysis of mtDNA lineages in the Japanese population. International Journal of Legal Medicine 2003, 117(4):218-225.
Mateu E, Comas D, Calafell F, Perez-Lezaun A, Abade A, Bertranpetit J: A tale of two islands: population history and mitochondrial DNA sequence variation of Bioko and Sao Tome, Gulf of Guinea. Ann Hum Genet 1997, 61(Pt 6):507-518.
Matsukusa H, Oota H, Haneji K, Toma T, Kawamura S, Ishida H: A Genetic Analysis of the Sakishima Islanders Reveals No Relationship With Taiwan Aborigines but Shared Ancestry With Ainu and Main-Island Japanese. American Journal of Physical Anthropology; 142: 211-223.
Melton T, Clifford S, Martinson J, Batzer M, Stoneking M: Genetic evidence for the proto-Austronesian homeland in Asia: mtDNA and nuclear DNA variation in Taiwanese aboriginal tribes. Am J Hum Genet 1998, 63(6):1807-1823.
Metspalu M, Kivisild T, Metspalu E, Parik J, Hudjashov G, Kaldma K, Serk P, Karmin M, Behar DM, Gilbert MT et al: Most of the extant mtDNA boundaries in south and southwest Asia were likely shaped during the initial settlement of Eurasia by anatomically modern humans. BMC Genet 2004, 5:26.
Mittal B, Tripathy V, Aruna M et al: Mitochondrial DNA variation and substructure among the tribal populations of Andhra Pradesh, India. Am J Hum Biol 2008; 20: 683-692.
Mountain JL, Hebert JM, Bhattacharyya S, Underhill PA, Ottolenghi C, Gadgil M, Cavalli-Sforza LL: Demographic history of India and mtDNA-sequence diversity. Am J Hum Genet 1995, 56(4):979-992.
Msaidie S, Ducourneau A, Boetsch G et al: Genetic diversity on the Comoros Islands shows early seafaring as major determinant of human biocultural evolution in the Western Indian Ocean. Eur J Hum Genet 2011; 19: 89-94.
Murray-McIntosh RP, Scrimshaw BJ, Hatfield PJ, Penny D: Testing migration patterns and estimating founding population size in Polynesia by using human mtDNA sequences. Proc Natl Acad Sci U S A 1998, 95(15):9047-9052.
Nishimaki Y, Sato K, Fang L, Ma M, Hasekura H, Boettcher B: Sequence polymorphism in the mtDNA HV1 region in Japanese and Chinese. Legal medicine (Tokyo, Japan) 1999, 1(4):238-249.
Nohira C, Maruyama S, Minaguchi K: Phylogenetic classification of Japanese mtDNA assisted by complete mitochondrial DNA sequences. International Journal of Legal Medicine 2010, 124(1):7-12.
Ohashi J, Naka I, Tokunaga K et al: Brief communication: Mitochondrial DNA variation suggests extensive gene flow from Polynesian ancestors to indigenous Melanesians in the Northwestern Bismarck Archipelago. American Journal of Physical Anthropology 2006; 130: 551-556.et al. 2006
Oota H, Settheetham-Ishida W, Tiwawech D, Ishida T, Stoneking M: Human mtDNA and Y-chromosome variation is correlated with matrilocal versus patrilocal residence. Nature Genetics 2001, 29(1):20-21.
Peng MS, Quang HH, Dang KP, Trieu AV, Wang HW, Yao YG, Kong QP, Zhang YP: Tracing the Austronesian footprint in Mainland Southeast Asia: a perspective from mitochondrial DNA. Mol Biol Evol 2010, 27(10):2417-2430.
Pereira L, Cerny V, Cerezo M, Silva NM, Hajek M, Vasikova A, Kujanova M, Brdicka R, Salas A: Linking the sub-Saharan and West Eurasian gene pools: maternal and paternal heritage of the Tuareg nomads from the African Sahel. Eur J Hum Genet 2010, 18(8):915-923.
Pereira L, Macaulay V, Torroni A, Scozzari R, Prata MJ, Amorim A: Prehistoric and historic traces in the mtDNA of Mozambique: insights into the Bantu expansions and the slave trade. Ann Hum Genet 2001, 65(Pt 5):439-458.
Pfeiffer H, Steighner R, Fisher R, Mornstad H, Yoon CL, Holland MM: Mitochondrial DNA extraction and typing from isolated dentin-experimental evaluation in a Korean population. Int J Legal Med 1998, 111(6):309-313.
Piercy R, Sullivan KM, Benson N, Gill P: The application of mitochondrial DNA typing to the study of white Caucasian genetic identification. Int J Legal Med 1993, 106(2):85-90.
Pierson MJ, Martinez-Arias R, Holland BR, Gemmell NJ, Hurles ME, Penny D: Deciphering past human population movements in Oceania: Provably optimal trees of 127 mtDNA genomes. Molecular Biology and Evolution 2006, 23(10):1966-1975.
Pinto F, Gonzalez AM, Hernandez M, Larruga JM, Cabrera VM: Genetic relationship between the Canary Islanders and their African and Spanish ancestors inferred from mitochondrial DNA sequences. Ann Hum Genet 1996, 60(Pt 4):321-330.
Plaza S, Salas A, Calafell F, Corte-Real F, Bertranpetit J, Carracedo A, Comas D: Insights into the western Bantu dispersal: mtDNA lineage analysis in Angola. Hum Genet 2004, 115(5):439-447.
Poloni ES, Naciri Y, Bucho R, Niba R, Kervaire B, Excoffier L, Langaney A, Sanchez-Mazas A: Genetic evidence for complexity in ethnic differentiation and history in East Africa. Ann Hum Genet 2009; 73(Pt 6):582-600.
Qian YP, Chu ZT, Dai Q, Wei CD, Chu JY, Tajima A, Horai S: Mitochondrial DNA polymorphisms in Yunnan nationalities in China. Journal of Human Genetics 2001, 46(4):211-220.
Qin Z, Yang Y, Kang L, Yan S, Cho K, Cai X, Lu Y, Zheng H, Zhu D, Fei D et al: A Mitochondrial Revelation of Early Human Migrations to the Tibetan Plateau Before and After the Last Glacial Maximum. American Journal of Physical Anthropology 2010, 143(4):555-569.
Quintana-Murci L, Chaix R, Wells RS, Behar DM, Sayar H, Scozzari R, Rengo C, Al-Zahery N, Semino O, Santachiara-Benerecetti AS et al: Where west meets east: the complex mtDNA landscape of the southwest and Central Asian corridor. Am J Hum Genet 2004, 74(5):827-845.
Quintana-Murci L, Quach H, Harmant C, Luca F, Massonnet B, Patin E, Sica L, Mouguiama-Daouda P, Comas D, Tzur S et al: Maternal traces of deep common ancestry and asymmetric gene flow between Pygmy hunter-gatherers and Bantu-speaking farmers. Proc Natl Acad Sci U S A 2008, 105(5):1596-1601.
Quintana-Murci L, Semino O, Bandelt HJ, Passarino G, McElreavey K, Santachiara-Benerecetti AS: Genetic evidence of an early exit of Homo sapiens sapiens from Africa through eastern Africa. Nat Genet 1999, 23(4):437-441.
Rajkumar R, Kashyap VK: Haplotype diversity in mitochondrial DNA hypervariable regions I and II in three communities of Southern India. Forensic Science International 2003, 136(1-3):79-82.
Rajkumar R, Kashyap VK: Mitochondrial DNA hypervariable region I and II sequence polymorphism in the Dravidian linguistic group of India. Journal of Forensic Sciences 2003, 48(1):227-237.
Rakha A, Shin K-J, Yoon JA, Kim NY, Siddique MH, Yang IS, Yang WI, Lee HY: Forensic and genetic characterization of mtDNA from Pathans of Pakistan. International Journal of Legal Medicine 2011, 125(6):841-848.
Rando JC, Pinto F, Gonzalez AM, Hernandez M, Larruga JM, Cabrera VM, Bandelt HJ: Mitochondrial DNA analysis of northwest African populations reveals genetic exchanges with European, near-eastern, and sub-Saharan populations. Ann Hum Genet 1998, 62(Pt 6):531-550.
Redd AJ, Stoneking M: Peopling of Sahul: mtDNA variation in aboriginal Australian and Papua New Guinean populations. Am J Hum Genet 1999, 65(3):808-828.
Ricaut FX, Thomas T, Arganini C et al: Mitochondrial DNA variation in Karkar Islanders. Annals of human genetics 2008; 72: 349-367. et al. 2008
Richard C, Pennarun E, Kivisild T, Tambets K, Tolk HV, Metspalu E, Reidla M, Chevalier S, Giraudet S, Lauc LB et al: An mtDNA perspective of French genetic variation. Ann Hum Biol 2007, 34(1):68-79.
Richards M, Corte-Real H, Forster P, Macaulay V, Wilkinson-Herbots H, Demaine A, Papiha S, Hedges R, Bandelt HJ, Sykes B: Paleolithic and neolithic lineages in the European mitochondrial gene pool. Am J Hum Genet 1996, 59(1):185-203.
Rosa A, Brehm A, Kivisild T, Metspalu E, Villems R: MtDNA profile of West Africa Guineans: towards a better understanding of the Senegambia region. Ann Hum Genet 2004, 68(Pt 4):340-352.
Rousselet F, Mangin P: Mitochondrial DNA polymorphisms: A study of 50 French Caucasian individuals and application to forensic casework. International Journal of Legal Medicine 1998, 111(6):292-298.
Roychoudhury S, Roy S, Basu A et al: Genomic structures and population histories of linguistically distinct tribal groups of India. Hum Genet 2001; 109: 339-350.
Sahoo S, Kashyap VK: Phylogeography of mitochondrial DNA and Y-chromosome haplogroups reveal asymmetric gene flow in populations of Eastern India. Am J Phys Anthropol 2006, 131(1):84-97.
Salas A, Richards M, De la Fe T, Lareu MV, Sobrino B, Sanchez-Diz P, Macaulay V, Carracedo A: The making of the African mtDNA landscape. Am J Hum Genet 2002, 71(5):1082-1111.
Seo Y, Stradmann-Bellinghausen B, Rittner C, Takahama K, Schneider PM: Sequence polymorphism of mitochondrial DNA control region in Japanese. Forensic Sci Int 1998, 97(2-3):155-164.
Sharma S, Saha A, Rai E, Bhat A, Bamezai R: Human mtDNA hypervariable regions, HVR I and II, hint at deep common maternal founder and subsequent maternal gene flow in Indian population groups. J Hum Genet 2005, 50(10):497-506.
Silva WA, Bortolini MC, Schneider MP, Marrero A, Elion J, Krishnamoorthy R, Zago MA: MtDNA haplogroup analysis of black Brazilian and sub-Saharan populations: implications for the Atlantic slave trade. Hum Biol 2006, 78(1):29-41.
Soares P, Alshamali F, Pereira JB, Fernandes V, Silva NM, Afonso C, Costa MD, Musilova E, Macaulay V, Richards MB et al: The Expansion of mtDNA Haplogroup L3 within and out of Africa. Mol Biol Evol 2012, 29(3):915-927.
Tabbada KA, Trejaut J, Loo J-H, Chen Y-M, Lin M, Mirazon-Lahr M, Kivisild T, De Ungria MCA: Philippine Mitochondrial DNA Diversity: A Populated Viaduct between Taiwan and Indonesia? (vol 27, pg 21, 2010). Molecular Biology and Evolution 2010, 27(7):1736-1737.
Tajima A, Hayami M, Tokunaga K, Juji T, Matsuo M, Marzuki S, Omoto K, Horai S: Genetic origins of the Ainu inferred from combined DNA analyses of maternal and paternal lineages. J Hum Genet 2004, 49(4):187-193.
Tajima A, Sun CS, Pan IH, Ishida T, Saitou N, Horai S: Mitochondrial DNA polymorphisms in nine aboriginal groups of Taiwan: implications for the population history of aboriginal Taiwanese. Hum Genet 2003, 113(1):24-33.
Tanaka M, Cabrera VM, Gonzalez AM, Larruga JM, Takeyasu T, Fuku N, Guo LJ, Hirose R, Fujita Y, Kurata M et al: Mitochondrial genome variation in eastern Asia and the peopling of Japan. Genome Res 2004, 14(10A):1832-1850.
Thangaraj K, Naidu BP, Crivellaro F, Tamang R, Upadhyay S, Sharma VK, Reddy AG, Walimbe SR, Chaubey G, Kivisild T et al: The influence of natural barriers in shaping the genetic structure of Maharashtra populations. PLoS ONE 2010, 5(12):e15283.
Thangaraj K, Ramana GV, Singh L: Y-chromosome and mitochondrial DNA polymorphisms in Indian populations. Electrophoresis 1999, 20(8):1743-1747.
Thanseem I, Thangaraj K, Chaubey G et al: Genetic affinities among the lower castes and tribal groups of India: inference from Y chromosome and mitochondrial DNA. BMC Genet 2006; 7: 42.
Thorsby E, Flam ST, Woldseth B, Dupuy BM, Sanchez-Mazas A, Fernandez-Vina MA: Further evidence of an Amerindian contribution to the Polynesian gene pool on Easter Island. Tissue Antigens 2009, 73(6):582-585.
Tofanelli S, Bertoncini S, Castri L, Luiselli D, Calafell F, Donati G, Paoli G: On the origins and admixture of Malagasy: new evidence from high-resolution analyses of paternal and maternal lineages. Mol Biol Evol 2009, 26(9):2109-2124.
Tommaseo-Ponzetta M, Attimonelli M, De Robertis M, Tanzariello F, Saccone C: Mitochondrial DNA variability of West New Guinea populations. American Journal of Physical Anthropology 2002; 117: 49-67.-Ponzetta et al. 2007
Trejaut JA, Kivisild T, Loo JH, Lee CL, He CL, Hsu CJ, Li ZY, Lin M: Traces of archaic mitochondrial lineages persist in Austronesian-speaking Formosan populations. Plos Biology 2005, 3(8):1362-1372.
Trovoada MJ, Pereira L, Gusmao L, Abade A, Amorim A, Prata MJ: Insights from pattern of mtDNA variation into the genetic history of Sao Tome e Principe. In: Progress in Forensic Genetics 10. Edited by Doutremepuich C, Morling N, vol. 1261; 2004b: 377-379.
Trovoada MJ, Pereira L, Gusmao L, Abade A, Amorim A, Prata MJ: Pattern of mtDNA variation in three populations from Sao Tome e Principe. Annals of human genetics 2004a, 68:40-54.
Tsai LC, Lin CY, Lee JCI, Chang JG, Linacre A, Goodwin W: Sequence polymorphism of mitochondrial D-loop DNA in the Taiwanese Han population. Forensic Science International 2001, 119(2):239-247.
Varesi L, Memmi M, Cristofari MC, Mameli GE, Calo CM, Vona G: Mitochondrial control-region sequence variation in the Corsican population, France. Am J Hum Biol 2000, 12(3):339-351.
Veeramah KR, Connell BA, Ansari Pour N, Powell A, Plaster CA, Zeitlyn D, Mendell NR, Weale ME, Bradman N, Thomas MG: Little genetic differentiation as assessed by uniparental markers in the presence of substantial language variation in peoples of the Cross River region of Nigeria. BMC Evol Biol 2010; 10:92.
Vigilant L, Stoneking M, Harpending H, Hawkes K, Wilson AC: African populations and the evolution of human mitochondrial DNA. Science 1991, 253(5027):1503-1507.
Vilar MG, Kaneko A, Hombhanje FW, Tsukahara T, Hwaihwanje I, Lum JK: Reconstructing the origin of the Lapita Cultural Complex: mtDNA analyses of East Sepik Province, PNG. J Hum Genet 2008; 53: 698-708.
Watkins WS, Thara R, Mowry BJ et al: Genetic variation in South Indian castes: evidence from Y-chromosome, mitochondrial, and autosomal polymorphisms. BMC Genet 2008; 9: 86.
Watson E, Forster P, Richards M, Bandelt HJ: Mitochondrial footprints of human expansions in Africa. Am J Hum Genet 1997, 61(3):691-704.
Wen B, Li H, Gao S, Mao XY, Gao Y, Li F, Zhang F, He YG, Dong YL, Zhang YJ et al: Genetic structure of Hmong-Mien speaking populations in east Asia as revealed by mtDNA lineages (vol 22, pg 725, 2005). Molecular Biology and Evolution 2005, 22(4):1160-1160.
Wen B, Li H, Lu D, Song X, Zhang F, He Y, Li F, Gao Y, Mao X, Zhang L et al: Genetic evidence supports demic diffusion of Han culture. Nature 2004a, 431(7006):302-305.
Wen B, Shi H, Ren L, Xi HF, Li KY, Zhang WY, Su B, Si SH, Jin L, Xiao CJ: The origin of Mosuo people as revealed by mtDNA and Y chromosome variation. Science in China Series C-Life Sciences 2004b, 47(1):1-10.
Whyte AL, Marshall SJ, Chambers GK: Human evolution in Polynesia. Hum Biol 2005, 77(2):157-177.
Wooding S, Ostler C, Prasad BV et al: Directional migration in the Hindu castes: inferences from mitochondrial, autosomal and Y-chromosomal data. Hum Genet 2004; 115: 221-229.
Yao YG, Kong QP, Wang CY, Zhu CL, Zhang YP: Different matrilineal contributions to genetic structure of ethnic groups in the silk road region in china. Mol Biol Evol 2004, 21(12):2265-2280.
Yao YG, Lu XM, Luo HR, Li WH, Zhang YP: Gene admixture in the silk road region of China: evidence from mtDNA and melanocortin 1 receptor polymorphism. Genes Genet Syst 2000, 75(4):173-178.
Yao YG, Nie L, Harpending H, Fu YX, Yuan ZG, Zhang YP: Genetic relationship of Chinese ethnic populations revealed by mtDNA sequence diversity. Am J Phys Anthropol 2002a, 118(1):63-76.
Yao YG, Zhang YP: Phylogeographic analysis of mtDNA variation in four ethnic populations from Yunnan Province: new data and a reappraisal. J Hum Genet 2002b, 47(6):311-318.
Zhao M, Kong QP, Wang HW, Peng MS, Xie XD, Wang WZ, Jiayang, Duan JG, Cai MC, Zhao SN et al: Mitochondrial genome evidence reveals successful Late Paleolithic settlement on the Tibetan Plateau. Proc Natl Acad Sci U S A 2009, 106(50):21230-21235.
Zimmermann B, Bodner M, Amory S, Fendt L, Rock A, Horst D, Horst B, Sanguansermsri T, Parson W, Brandstatter A: Forensic and phylogeographic characterization of mtDNA lineages from northern Thailand (Chiang Mai). Int J Legal Med 2009, 123(6):495-501.
